# Supplementary material for: CeO2 nanoarray decorated Ce-doped ZnO nanowire photoanode for efficient hydrogen production with glycerol as a sacrificial agent
Source: Royal Society of Chemistry journal article supplement (doi:10.1039/d2cy00558a), 2022-01-01
Supplement: d2cy00558a1.pdf [file d2cy00558a1.pdf]

## **CeO<sub>2</sub> Nanoarrays Decorated Ce-doped ZnO Nanowire Photoanode for Efficient Hydrogen Production with Glycerol as a Sacrificial Agent**

Seungkyu Kim,<sup>a,†</sup> Eunui An,<sup>a,‡</sup> Inhyeok Oh,<sup>a</sup> Jun Beom Hwang,<sup>a</sup> Sehun Seo,<sup>a</sup> Yoonsung Jung,<sup>a</sup> Jun-Cheol Park,<sup>a</sup> Hansol Choi,<sup>a</sup> Chang Hyuck Choi,<sup>b</sup> Sanghan Lee,<sup>\*a, c</sup>

*a. School of Material Science and Engineering, Gwangju Institute of Science and Technology, Gwangju Institute of Science and Technology, 123 Cheomdan-gwagiro, Buk-gu, Gwangju 61005, Republic Korea, E-mail: sanghan@gist.ac.kr*

*b. Department of Chemistry, Pohang University of Science and Technology (POSTECH), Pohang 37673, Republic of Korea*

*c. Research Center for Innovative Energy and Carbon Optimized Synthesis for Chemicals(Inn-ECOSysChem), Gwangju Institute of Science and Technology, 123 Cheomdan-gwagiro, Buk-gu, Gwangju 61005, Republic Korea*

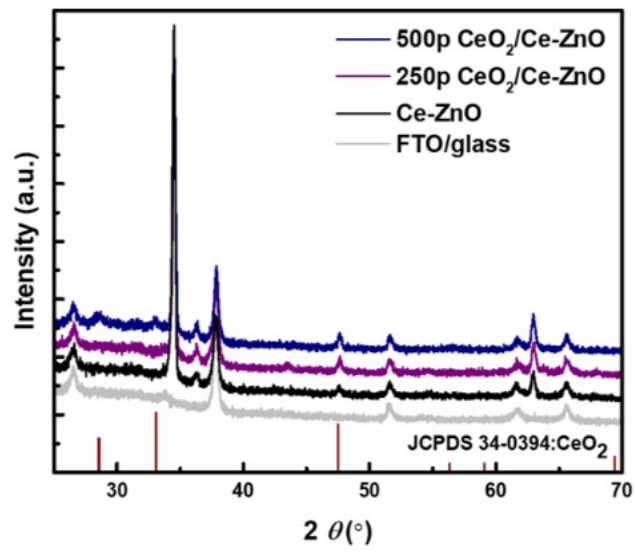

Fig. S1 XRD of FTO substrate, CeO<sub>2</sub> (250 p)/FTO, and CeO<sub>2</sub> (250, 500 p)/Ce-ZnO electrodes.

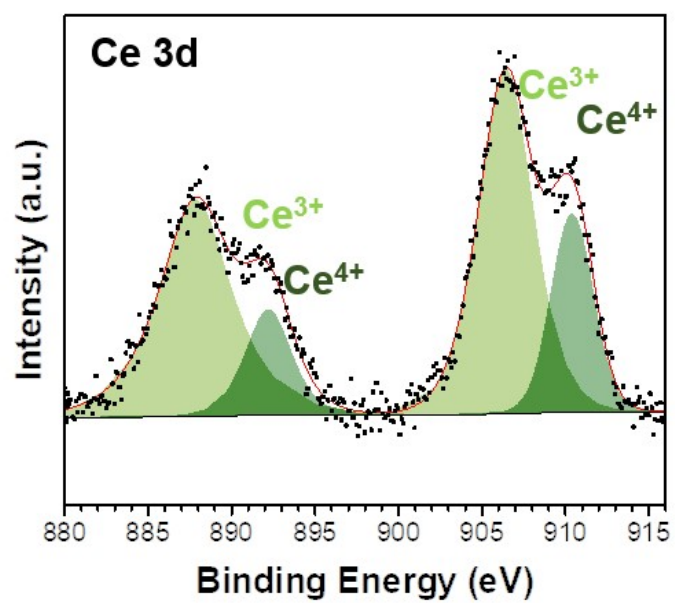

Fig. S2 XPS spectra of Ce-ZnO NWs: HR-XPS spectrum of Ce.

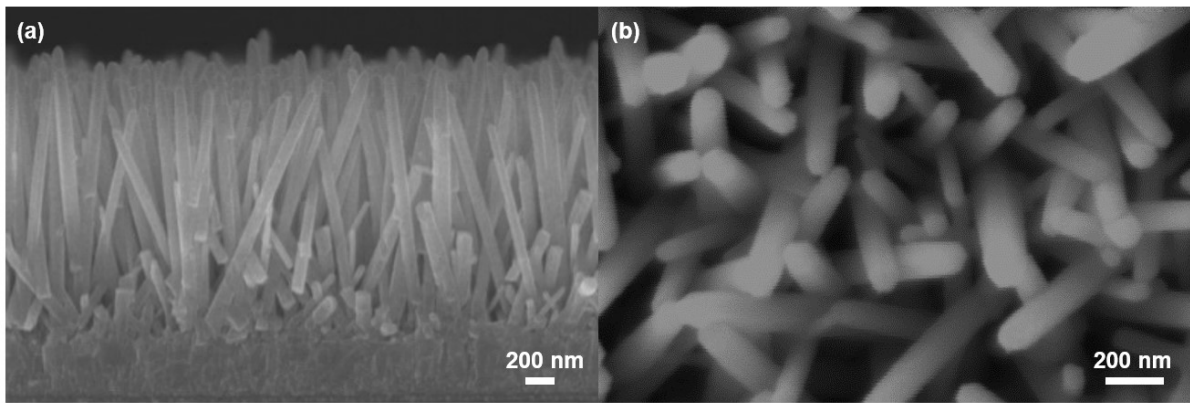

Fig. S3 (a) and (b) SEM images of  $\text{CeO}_2/\text{Ce-ZnO}$  NWs electrode.

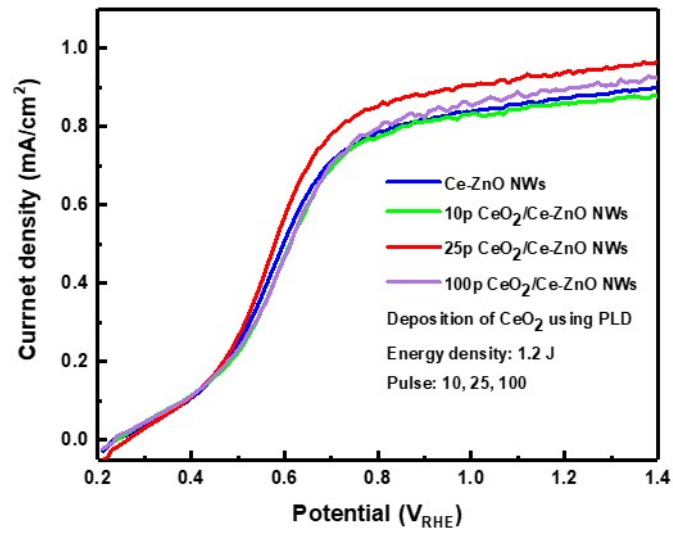

Fig. S4 LSV curves of Ce-ZnO and CeO<sub>2</sub>(10, 25, 100 p)/Ce-ZnO NWs electrode in 0.1 M KOH with 0.1 M glycerol

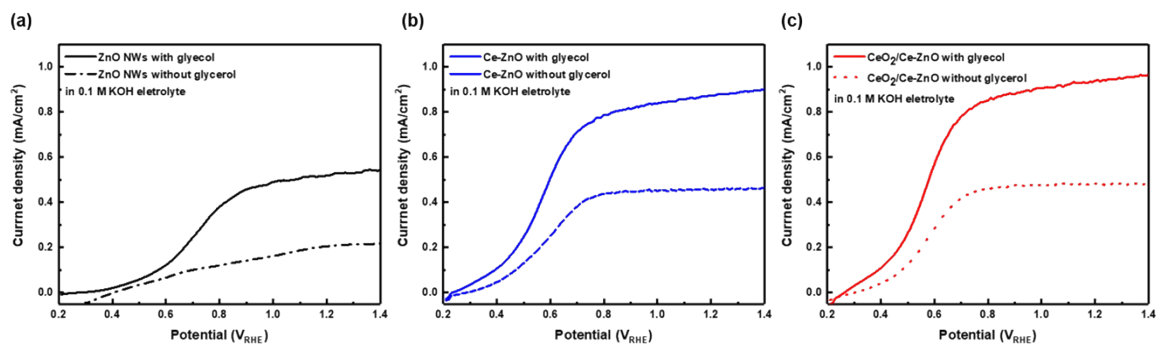

Fig. S5 LSV curves of ZnO NWs, Ce-ZnO, and CeO<sub>2</sub>/Ce-ZnO in 0.1 M KOH with(line)/without(dashed) 0.1 M glycerol

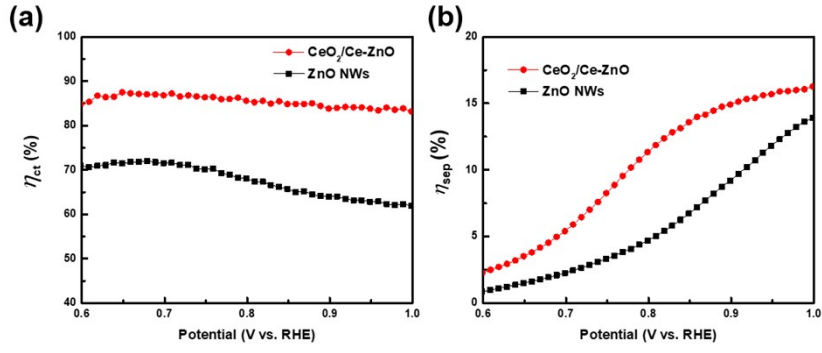

Fig. S6 (a) charge transfer efficiency and (b) charge separation efficiency of bare ZnO NWs and CeO<sub>2</sub> (25 p)/Ce-ZnO photoanode.

The above result was calculated using the following equation.

$$\eta_{ct} = \frac{J_{H_2O}}{J_{glycerol}} \quad (1)$$

$$\eta_{sep} = \frac{J_{glycerol}}{J_{abs}} \quad (2)$$

The obtained photocurrent density,  $J_{H_2O}$ , could be represented as follows:

$$J_{H_2O} = J_{abs} \times \eta_{sep} \times \eta_{ct} \quad (3)$$

Since there is no hole injection barrier for glycerol oxidation ( $\eta_{ct} = 1$ ):

$$J_{glycerol} = J_{abs} \times \eta_{sep} \quad (4)$$

Here,  $J_{glycerol}$  is the photocurrent density measured with glycerol photo-oxidation and  $J_{abs}$  is the photocurrent density expected when absorbed photons are completely converted into current. Estimated  $J_{abs}$  of ZnO NWs and CeO<sub>2</sub>/Ce-ZnO are about 2.83 and 5.31 mA/cm<sup>2</sup>, respectively

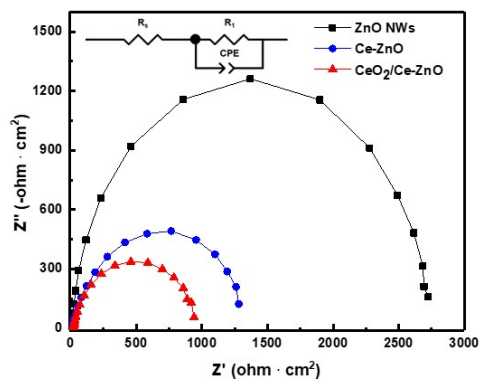

Fig. S7 EIS spectra of bare ZnO NWs, Ce-ZnO, and CeO<sub>2</sub>/Ce-ZnO photoanode. Insert shows the equivalent circuit used for it.

| Photoanode               | R <sub>s</sub> (Ω·cm <sup>2</sup> ) | R <sub>1</sub> (Ω·cm <sup>2</sup> ) |
|--------------------------|-------------------------------------|-------------------------------------|
| ZnO NWS                  | 13.0                                | 2711.0                              |
| Ce-ZnO                   | 13.8                                | 1299.0                              |
| CeO <sub>2</sub> /Ce-ZnO | 27.7                                | 916.3                               |

Table S1 Comparison of charge transfer resistance results of photoanodes



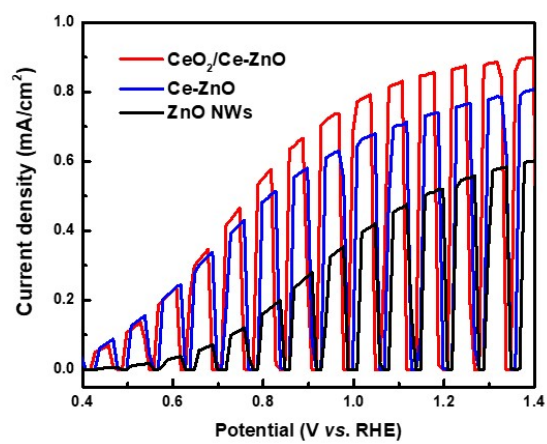

Fig. S8 LSV curves of ZnO NWs, Ce-ZnO, and CeO<sub>2</sub>/Ce-ZnO photoanodes under chopped illumination.

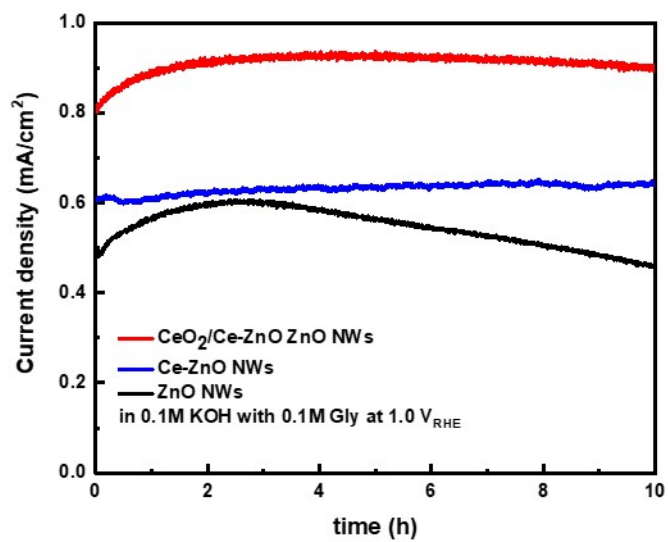

Fig. S9. I-t curves of bare ZnO, Ce-ZnO and CeO<sub>2</sub>(25 p)/Ce-ZnO photoanode in 0.1 M KOH with 0.1 M glycerol
